# Supplementary material for: A systematic review of clinical guidelines on the management of acute, community-acquired CNS infections
Source: PubMed Central journal article supplement (PMC6729038; doi:10.1186/s12916-019-1387-5), 2019-09-06
Supplement: 12916_2019_1387_MOESM2_ESM.pdf [file 12916_2019_1387_MOESM2_ESM.pdf]

| Guidelines                                                                                                                                                                  | Year             | Target region  | Authorising Body                                                               | Focus                          | Target Population     | Language         |
|-----------------------------------------------------------------------------------------------------------------------------------------------------------------------------|------------------|----------------|--------------------------------------------------------------------------------|--------------------------------|-----------------------|------------------|
| Case definitions, diagnostic algorithms, and priorities in Encephalitis: Consensus statement of the International Encephalitis Consortium (IEC)                             | 2013             | US/Global      | International Encephalitis Consortium (IEC)                                    | Viral encephalitis             | A, P                  | English          |
| Viral meningoencephalitis: a review of diagnostic methods and guidelines for management (EFNS)                                                                              | 2010             | Europe         | European Federation of Neurological Societies (EFNS)                           | Viral meningoencephalitis      | U                     | English          |
| Akut infektøus encefalitis(DNS)                                                                                                                                             | 2017             | Denmark        | Dansk Neurologisk Selskab (DNS)                                                | Viral encephalitis             | U                     | Danish           |
| Virale Meningoenzephalitis (DGN)                                                                                                                                            | 2018             | Germany        | Deutsche Gesellschaft für Neurologie (DGN)                                     | Viral meningoencephalitis      | U                     | German           |
| The Management of Encephalitis: Clinical Practice Guidelines by the Infectious Diseases Society of America (IDSA)                                                           | 2008             | US/Global      | Infectious Diseases Society of America (IDSA)                                  | Viral encephalitis             | A,P                   | English          |
| UK Standards for Microbiology Investigations: Investigation of Viral Encephalitis (PHE:VE)                                                                                  | 2014             | UK             | Public Health England (PHE)                                                    | Viral encephalitis             | U                     | English          |
| Management of suspected viral encephalitis in adults (BIA/ABN)                                                                                                              | 2012             | UK             | British Infection Association (BIA), Association of British Neurologists (ABN) | Viral encephalitis             | A                     | English          |
| Management of suspected viral encephalitis in children (BIA/ABN/BPAIIG)                                                                                                     | 2012             | UK             | BIA, ABN, British Paediatric Allergy Immunity and Infection Group (BPAIIG)     | Viral encephalitis             | P (<16 yo)            | English          |
| Encefalitis (AEPED)                                                                                                                                                         | 2011             | Spain          | Asociación Española de Pediatría (AEPED)                                       | Viral encephalitis             | P                     | Spanish          |
| Guidelines on the management of infectious encephalitis in adults (SPILF)                                                                                                   | 2017             | France         | Société de Pathologie Infectieuse de Langue Française (SPILF)                  | Infectious encephalitis        | A                     | English (French) |
| Veileder I Akuttneurologi: Infeksjoner/NevroNEL (NNF)                                                                                                                       | 2017             | Norway         | Norsk Neurologisk Forening (NNF)                                               | Infectious encephalitis        | U                     | Norwegian        |
| UK Standards for Microbiology Investigations: Meningoencephalitis (PHE:ME)                                                                                                  | 2014             | United Kingdom | Public Health England (PHE)                                                    | Infectious meningoencephalitis | U                     | English          |
| EFNS guideline on the management of community-acquired bacterial meningitis: report on an EFNS Task Force on acute bacterial meningitis in older children and adults (EFNS) | 2008 (rev. 2010) | Europe         | European Federation of Neurological Societies (EFNS)                           | Bacterial meningitis           | A, P (older children) | English          |
| Diagnosis and treatment of acute bacterial meningitis (ESCMID)                                                                                                              | 2016             | Europe         | European Society of Clinical Microbiology and Infectious Diseases (ESCMID)     | Bacterial meningitis           | A, P                  | English          |
| Rekommandationer for initial behandling af akut bakteriel meningitis hos voksne (DSI)                                                                                       | 2018             | Denmark        | Dansk Selskab for Infektionsmedicin (DSI)                                      | Bacterial meningitis           | A                     | Danish           |
| Practice guidelines for acute bacterial meningitis (except newborn and nosocomial meningitis)(SPILF)                                                                        | 2008             | France         | Société de Pathologie Infectieuse de Langue Française (SPILF)                  | Bacterial meningitis           | A, P                  | English (French) |
| Ambulant erworbene bakterielle (eitrige) Meningoenzephalitis im Erwachsenenalter (DGN:BM)                                                                                   | 2018             | Germany        | Deutsche Gesellschaft für Neurologie (DGN)                                     | Bacterial meningitis           | A                     | German           |
| Guidelines for the early clinical and public health management of bacterial meningitis (including Meningococcal Disease) (HPSC)                                             | 2016             | Ireland        | Health Protection Surveillance Centre (HPSC)                                   | Bacterial meningitis           | A, P                  | English          |
| Bacteriële Meningitis (NVN)                                                                                                                                                 | 2013             | Netherlands    | Nederlandse Vereniging voor Neurologie (NVN)                                   | Bacterial meningitis           | A, P                  | Dutch            |
| Clinical Practice Guideline on the Management of Invasive Meningococcal Disease (MHSSE)                                                                                     | 2013             | Spain          | Ministry of Health, Social Services and Equality (MHSSE)                       | Meningococcal Disease          | P                     | English, Spanish |
