# Supplementary material for: A systematic review of clinical guidelines on the management of acute, community-acquired CNS infections
Source: BMC Med. 2019 Sep 6;17:170. doi: 10.1186/s12916-019-1387-5 (PMC6729038; doi:10.1186/s12916-019-1387-5)
Supplement: Supplementary file 1 — AGREE II Instrument for the Quality Assessment of Clinical Management Guidelines (PDF 76 kb) [file 12916_2019_1387_MOESM1_ESM.pdf]

# **Additional file 1. AGREE II Instrument for the Quality Assessment of Clinical Management Guidelines**

| AGREE II Domain          | AGREE II Item                                                                                              |
|--------------------------|------------------------------------------------------------------------------------------------------------|
| Scope and Purpose        | The overall objective(s) of the guideline is (are) specifically described                                  |
|                          | The health question(s) covered by the guideline is (are) specifically described                            |
|                          | The population (patients, public, etc.) to whom the guideline is meant to apply is specifically described. |
| Stakeholder Involvement  | The guideline development group includes individuals from all relevant professional groups                 |
|                          | The views and preferences of the target population (patients, public, etc.) have been sought               |
|                          | The target users of the guideline are clearly defined                                                      |
| Rigour of Development    | Systematic methods were used to search for evidence.                                                       |
|                          | The criteria for selecting the evidence are clearly described                                              |
|                          | The strengths and limitations of the body of evidence are clearly described                                |
|                          | The methods for formulating the recommendations are clearly described                                      |
|                          | The health benefits, side effects, and risks have been considered in formulating the recommendations       |
|                          | There is an explicit link between the recommendations and the supporting evidence.                         |
|                          | The guideline has been externally reviewed by experts prior to its publication                             |
| Clarity and Presentation | A procedure for updating the guideline is provided                                                         |
|                          | The recommendations are specific and unambiguous                                                           |
|                          | The different options for management of the condition or health issue are clearly presented                |
| Applicability            | Key recommendations are easily identifiable                                                                |
|                          | The guideline describes facilitators and barriers to its application                                       |
|                          | The guideline provides advice and/or tools on how the recommendations can be put into practice             |
|                          | The potential resource implications of applying the recommendations have been considered                   |
| Editorial Independence   | The guideline presents monitoring and/or auditing criteria                                                 |
|                          | The views of the funding body have not influenced the content of the guideline                             |
|                          | Competing interests of guideline development group members have been recorded and addressed                |
| <b>Overall Score</b>     |                                                                                                            |
| Overall Quality          | 1 – 7 (1=lowest possible quality, 7=highest possible quality)                                              |
| Recommended for Use      | Yes/Yes, with modifications/No                                                                             |
